# Supplementary material for: Towards the prediction of protein interaction partners using physical docking
Source: PubMed Central journal article supplement — Mol Syst Biol. 2011 Feb 15;7:469. doi: 10.1038/msb.2011.3 (PMC3063693; doi:10.1038/msb.2011.3), 2011-02-15
Supplement: msb20113-s3.pdf [file msb20113-s3.pdf]

## Towards the prediction of protein interaction partners using physical docking

Mark Wass, Gloria Fuentes, Carles Pons, Florencio Pazos and Alfonso Valencia

*Corresponding author: Alfonso Valencia, Centro de Investigaciones Oncologicas*

---

### Review timeline:

Submission date:

10 October 2010

Accepted:

23 December 2010

---

### Transaction Report:

(Note: With the exception of the correction of typographical or spelling errors that could be a source of ambiguity, letters and reports are not edited. The original formatting of letters and referee reports may not be reflected in this compilation.)

An earlier version of this manuscript was submitted to *Molecular Systems Biology* and assessed before September 2010. As the original review of the manuscript therefore predates the implementation of *Molecular System Biology's* transparent review process policy, no Peer Review Process File is available with this article.
